# Supplementary material for: Light-trapping enhanced ZnO–MoS2 core–shell nanopillar arrays for broadband ultraviolet-visible-near infrared photodetection
Source: Royal Society of Chemistry journal article supplement (doi:10.1039/c8tc02139b), 2018-01-01
Supplement: c8tc02139b1.pdf [file c8tc02139b1.pdf]

## Electronic Supplementary Information

# Light-trapping enhanced ZnO-MoS<sub>2</sub> core-shell nanopillar arrays for broadband ultraviolet-visible-near infrared photodetection

*Ling Ning,<sup>‡</sup> Tianhao Jiang,<sup>‡</sup> Zhibin Shao,\* Ke Ding, Xiujuan Zhang, and Jiansheng Jie\**

Institute of Functional Nano & Soft Materials (FUNSOM), Collaborative Innovation Center of Suzhou Nano Science and Technology (Nano-CIC), Jiangsu Key Laboratory for Carbon-Based Functional Materials & Devices, Soochow University, Suzhou, Jiangsu 215123, P. R. China

\*Email: [jsjie@suda.edu.cn](mailto:jsjie@suda.edu.cn); [zbshao@suda.edu.cn](mailto:zbshao@suda.edu.cn).

<sup>‡</sup>Dual Contributors

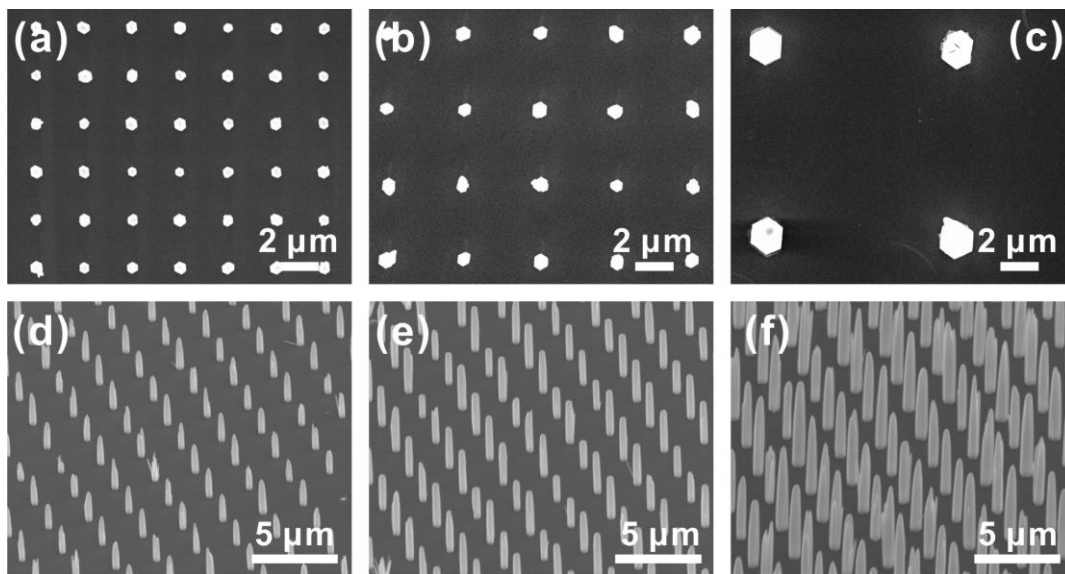

**Figure S1.** (a-c) Top-view SEM images of ZnO NP arrays with different spacings of 2.5, 4, and 10  $\mu\text{m}$ , respectively. (d-f) Tilted-view SEM images of ZnO NP arrays with different heights of 1.5, 3, and 4.5  $\mu\text{m}$ , respectively.

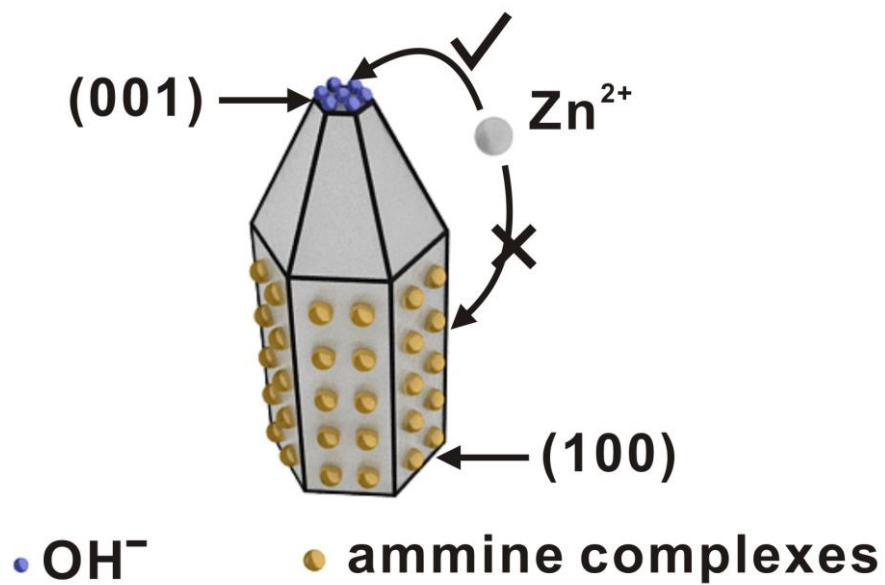

**Figure S2.** The growth process of ZnO NP.

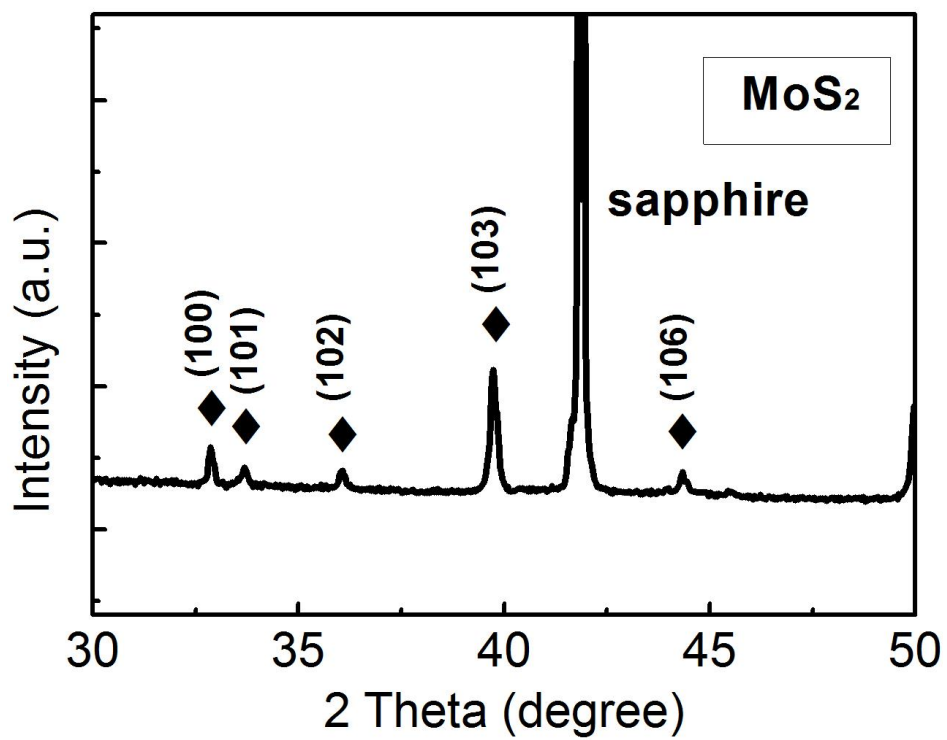

**Figure S3.** XRD pattern of the MoS<sub>2</sub> film directly deposited on the sapphire substrate.

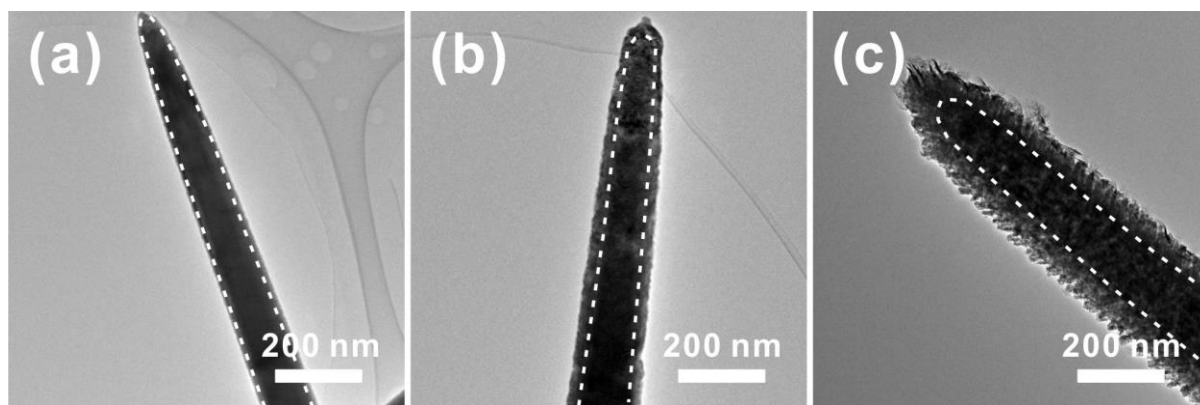

**Figure S4.** TEM images of ZnO-MoS<sub>2</sub> core-shell NPs with different MoS<sub>2</sub> layer thicknesses of 6, 22, and 75 nm, respectively.

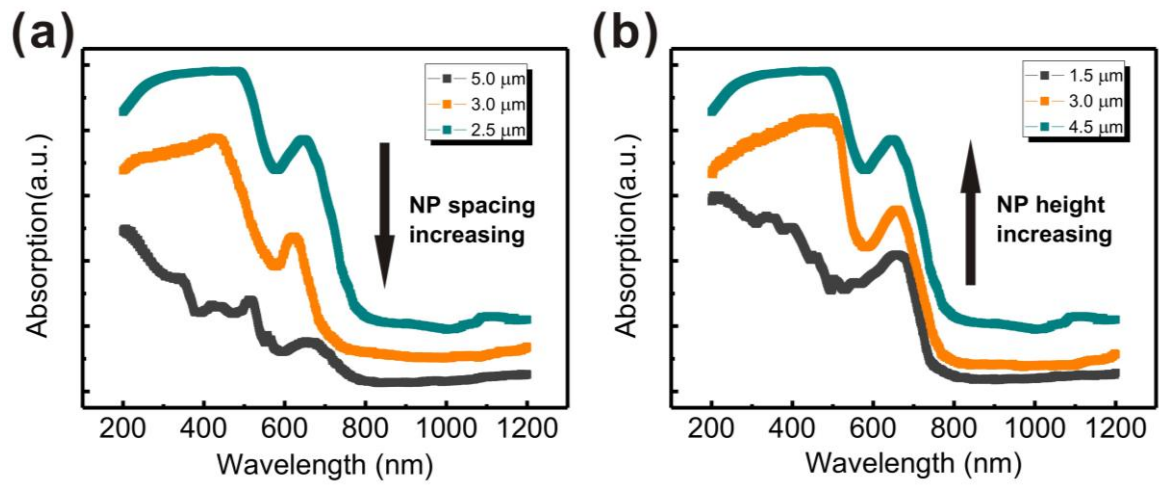

**Figure S5.** Simulated absorption spectra of ZnO-MoS<sub>2</sub> core-shell NP arrays with different (a) spacings and (b) heights.

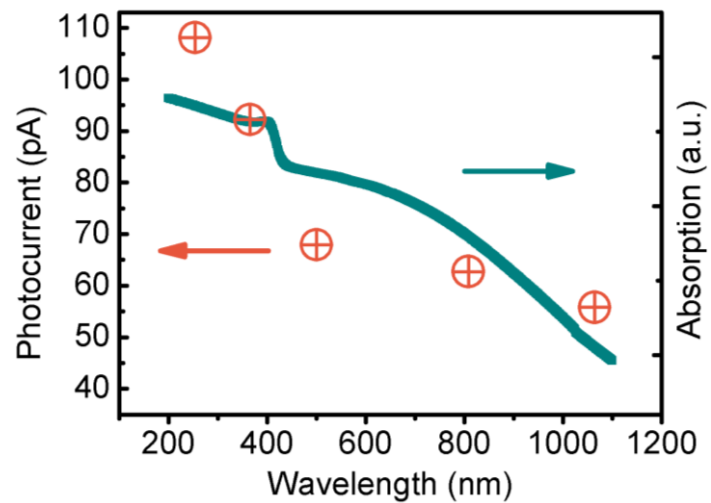

**Figure S6.** Photocurrent spectrum and optical absorption spectrum of the ZnO-MoS<sub>2</sub> core-shell NP array.

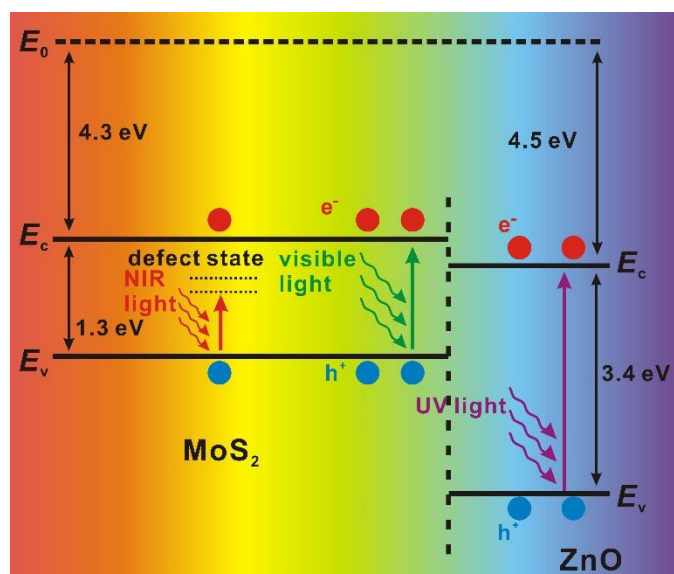

**Figure S7.** Energy band diagram of the ZnO-MoS<sub>2</sub> core-shell NP.
